# Supplementary material for: Association between dietary sodium, potassium intake and lung cancer risk: evidence from the prostate, lung, colorectal and ovarian cancer screening trial and the Women’s Health Initiative
Source: PubMed Central journal article supplement — Transl Lung Cancer Res. 2021 Jan;10(1):45–56. doi: 10.21037/tlcr-20-870 (PMC7867772; doi:10.21037/tlcr-20-870), 2021-01
Supplement: tlcr-10-01-45-supplementary.pdf [file tlcr-10-01-45-supplementary.pdf]

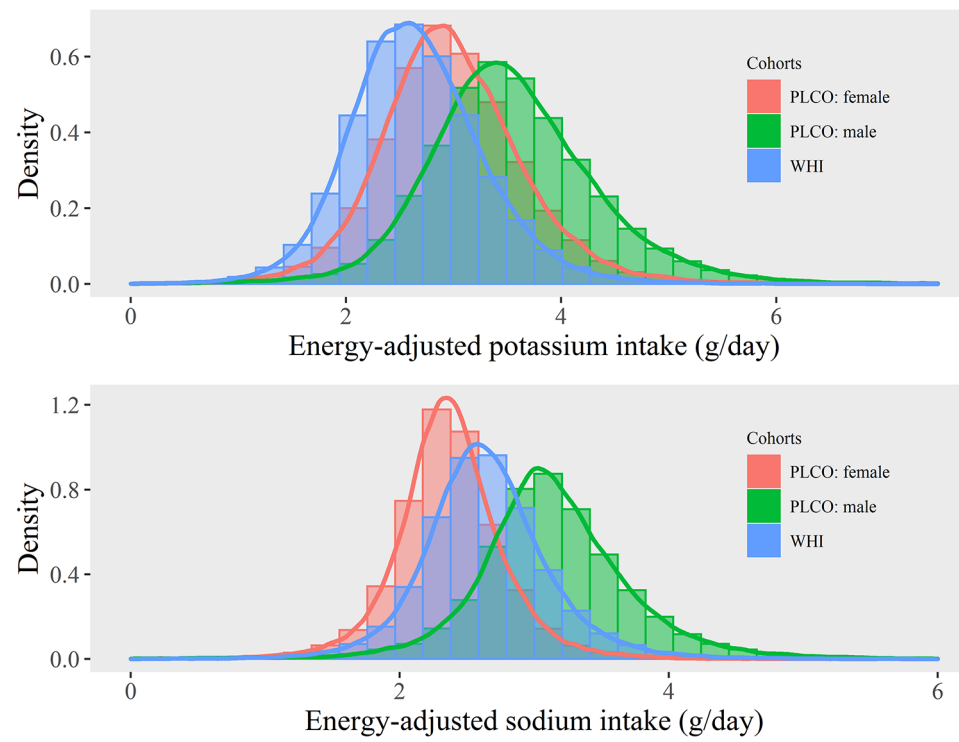

**Figure S1** The distributions of potassium and sodium intake in the PLCO and WHI cohorts. Solid lines represented kernel density estimates.

**Table S1** Baseline characteristics of the study population in the PLCO trial based on quintiles of sodium and potassium intake

| Baseline characteristics<br>Quintiles <sup>a</sup>      | Sodium    |          |          |          |          |                      | Potassium |          |          |          |          |                      |
|---------------------------------------------------------|-----------|----------|----------|----------|----------|----------------------|-----------|----------|----------|----------|----------|----------------------|
|                                                         | 1 (low)   | 2        | 3        | 4        | 5 (high) | P value <sup>d</sup> | 1 (low)   | 2        | 3        | 4        | 5 (high) | P value <sup>d</sup> |
| Total (N)                                               | 18597     | 18597    | 18597    | 18597    | 18596    |                      | 18597     | 18597    | 18597    | 18597    | 18596    |                      |
| No. of lung cancer (n)                                  | 299       | 229      | 238      | 265      | 247      |                      | 273       | 243      | 243      | 247      | 272      |                      |
| Median mineral intake (mg/d <sup>3</sup> ) <sup>b</sup> | 2201.5    | 2526.2   | 2719.2   | 2932.2   | 3329.6   | <0.001               | 2410.4    | 2878.9   | 3203.5   | 3567.7   | 4177.1   | <0.001               |
| Age (year) <sup>c</sup>                                 | 62.5±5.4  | 62.6±5.3 | 62.4±5.3 | 62.2±5.2 | 61.9±5.1 | <0.001               | 61.8±5.2  | 62.3±5.2 | 62.5±5.3 | 62.6±5.3 | 62.5±5.3 | <0.001               |
| Gender (%)                                              |           |          |          |          |          |                      |           |          |          |          |          |                      |
| Female                                                  | 45.8      | 58.6     | 58.5     | 54.6     | 40.7     | <0.001               | 41.1      | 52.6     | 55.3     | 56.1     | 53.1     | <0.001               |
| Male                                                    | 54.2      | 41.4     | 41.5     | 45.4     | 59.3     |                      | 58.9      | 47.4     | 44.7     | 43.9     | 46.9     |                      |
| Body mass index (kg/m <sup>2</sup> ) <sup>c</sup>       | 26.6±4.5  | 26.7±4.6 | 27.1±4.7 | 27.6±4.9 | 28.3±5.1 | <0.001               | 27.7±4.9  | 27.4±4.8 | 27.2±4.8 | 27.0±4.7 | 27.0±4.7 | <0.001               |
| Education (%)                                           |           |          |          |          |          |                      |           |          |          |          |          |                      |
| Low                                                     | 28.9      | 29.3     | 28.6     | 28.2     | 28.3     | 0.100                | 32.6      | 29.5     | 28.2     | 27.0     | 26.0     | <0.001               |
| Middle                                                  | 34.8      | 34.5     | 34.4     | 34.7     | 34.0     |                      | 34.5      | 34.9     | 34.7     | 34.3     | 34.0     |                      |
| High                                                    | 36.3      | 36.2     | 37.0     | 37.1     | 37.7     |                      | 32.9      | 35.6     | 37.1     | 38.7     | 40.0     |                      |
| Cigarette smoking (%)                                   |           |          |          |          |          |                      |           |          |          |          |          |                      |
| Never                                                   | 44.9      | 51.2     | 51.1     | 48.5     | 43.6     | <0.001               | 47.2      | 49.8     | 49.2     | 48.0     | 45.2     | <0.001               |
| Former <20 pack-years                                   | 18.6      | 18.6     | 18.9     | 18.4     | 18.5     |                      | 16.7      | 18.2     | 19.0     | 19.4     | 19.7     |                      |
| Former ≥20 pack-years                                   | 24.4      | 21.7     | 22.1     | 24.7     | 28.5     |                      | 25.1      | 23.3     | 23.6     | 24.0     | 25.5     |                      |
| Current <20 pack-years                                  | 0.9       | 0.8      | 0.7      | 0.8      | 0.8      |                      | 0.9       | 0.8      | 0.7      | 0.8      | 0.8      |                      |
| Current ≥20 pack-years                                  | 11.2      | 7.7      | 7.2      | 7.4      | 8.6      |                      | 10.2      | 7.9      | 7.5      | 7.8      | 8.8      |                      |
| Alcohol intake (g/day) <sup>c</sup>                     | 23.5±50.4 | 7.6±12.9 | 6.1±11.1 | 5.7±10.1 | 5.9±10.6 | <0.001               | 18.9±48.6 | 8.5±17.1 | 7.6±13.9 | 7.2±13.1 | 6.7±12.3 | <0.001               |
| Energy intake (kcal/day) <sup>c</sup>                   | 1951±831  | 1506±620 | 1507±607 | 1652±618 | 2088±766 | <0.001               | 1928±899  | 1585±678 | 1587±634 | 1664±629 | 1940±708 | <0.001               |
| Diabetes (%)                                            | 3.3       | 4.3      | 5.8      | 7.7      | 11.5     | <0.001               | 5.7       | 6.6      | 6.5      | 6.7      | 7.1      | <0.001               |
| Family history of lung cancer (%)                       | 11.0      | 10.6     | 10.3     | 10.6     | 11.1     | 0.090                | 10.4      | 10.5     | 11.0     | 11.0     | 10.6     | 0.153                |

<sup>a</sup>Quintile boundaries were based on sub-cohort members. <sup>b</sup>Intake was energy-adjusted (mg/day). <sup>c</sup>ALL values were mean ± sd. <sup>d</sup>P value for difference was tested using Kruskal-Wallis test (continuous) or Chi-square test (categorical).

**Table S2** Baseline characteristics of the study population in the WHI cohort based on quintiles of sodium and potassium intake

| Baseline characteristics<br>Quintiles <sup>a</sup> | Sodium    |           |          |          |          |                      | Potassium |           |           |           |           |                      |
|----------------------------------------------------|-----------|-----------|----------|----------|----------|----------------------|-----------|-----------|-----------|-----------|-----------|----------------------|
|                                                    | 1 (low)   | 2         | 3        | 4        | 5 (high) | P value <sup>d</sup> | 1 (low)   | 2         | 3         | 4         | 5 (high)  | P value <sup>d</sup> |
| Total (N)                                          | 14485     | 14485     | 14485    | 14485    | 14485    |                      | 14485     | 14485     | 14485     | 14485     | 14485     |                      |
| No. of lung cancer (n)                             | 337       | 293       | 343      | 313      | 345      |                      | 368       | 336       | 332       | 304       | 291       |                      |
| Median mineral intake (mg/day) <sup>b</sup>        | 2100.8    | 2416.7    | 2620.2   | 2835.3   | 3212.1   | <0.001               | 1914.1    | 2324.2    | 2619.5    | 2934.5    | 3450.3    | <0.001               |
| Age (year) <sup>c</sup>                            | 63.1±7.4  | 63.5±7.3  | 63.5±7.3 | 63.4±7.3 | 63.3±7.2 | <0.001               | 62.2±7.3  | 63.2±7.4  | 63.5±7.2  | 63.8±7.3  | 64.2±7.2  | <0.001               |
| Body mass index (kg/m <sup>2</sup> ) <sup>c</sup>  | 27.1±5.9  | 26.8±5.6  | 27.0±5.6 | 27.3±5.8 | 27.8±6.1 | <0.001               | 28.9±6.7  | 27.3±5.8  | 26.8±5.5  | 26.6±5.4  | 26.3±5.2  | <0.001               |
| Education (%)                                      |           |           |          |          |          |                      |           |           |           |           |           |                      |
| Low                                                | 22.7      | 21.8      | 21.0     | 19.9     | 19.0     | <0.001               | 32.1      | 23.3      | 19.1      | 16.4      | 13.5      | <0.001               |
| Middle                                             | 36.8      | 36.6      | 36.6     | 35.6     | 35.5     |                      | 38.2      | 38.0      | 36.5      | 35.4      | 33.2      |                      |
| High                                               | 40.5      | 41.6      | 42.4     | 44.5     | 45.5     |                      | 29.7      | 38.7      | 44.4      | 48.2      | 53.3      |                      |
| Cigarette smoking (%)                              |           |           |          |          |          |                      |           |           |           |           |           |                      |
| Never                                              | 50.6      | 53.5      | 54.0     | 53.2     | 50.2     | <0.001               | 51.2      | 52.3      | 52.3      | 52.2      | 53.5      | <0.001               |
| Former <20 pack-years                              | 25.8      | 26.6      | 26.7     | 26.8     | 28.2     |                      | 23.5      | 25.8      | 27.4      | 28.9      | 28.5      |                      |
| Former ≥20 pack-years                              | 14.8      | 13.3      | 13.7     | 15.0     | 16.6     |                      | 14.4      | 14.9      | 15.0      | 14.5      | 14.6      |                      |
| Current <20 pack-years                             | 3.0       | 2.7       | 2.3      | 2.0      | 2.1      |                      | 3.9       | 2.9       | 2.2       | 1.7       | 1.4       |                      |
| Current ≥20 pack-years                             | 5.8       | 3.9       | 3.3      | 3.0      | 2.9      |                      | 7.0       | 4.1       | 3.1       | 2.7       | 2.0       |                      |
| Alcohol intake (g/day) <sup>c</sup>                | 9.50±17.9 | 5.72±10.0 | 4.68±8.3 | 4.14±7.6 | 3.82±7.3 | <0.001               | 5.24±12.7 | 5.75±11.2 | 5.91±11.0 | 5.80±10.5 | 5.17±10.2 | <0.001               |
| Energy intake (kcal/day) <sup>c</sup>              | 1762±651  | 1449±524  | 1420±525 | 1478±539 | 1742±631 | <0.001               | 1722±751  | 1437±563  | 1452±526  | 1520±503  | 1718±534  | <0.001               |
| Diabetes (%)                                       | 3.3       | 4.0       | 4.8      | 5.8      | 8.2      | <0.001               | 6.4       | 5.7       | 4.7       | 4.7       | 4.7       | <0.001               |
| Family history of cancer (%)                       | 63.4      | 64.0      | 64.7     | 64.0     | 64.4     | 0.171                | 62.3      | 63.6      | 64.5      | 64.4      | 65.6      | <0.001               |

<sup>a</sup>Quintile boundaries were based on sub-cohort members. <sup>b</sup>Intake was energy-adjusted (mg/day). <sup>c</sup>ALL values were mean ± sd. <sup>d</sup>P value for difference was tested using Kruskal-Wallis test (continuous) or Chi-square test (categorical).

**Table S3** Correlation coefficients between dietary mineral intake and dietary food sources

| Meals and Nutrients | WHI cohort |        | PLCO trial |        |
|---------------------|------------|--------|------------|--------|
|                     | Potassium  | Sodium | Potassium  | Sodium |
| Fruit               | 0.574      | 0.162  | 0.511      | 0.178  |
| Vegetable           | 0.549      | 0.347  | 0.663      | 0.604  |
| Meat or Protein     | 0.799      | 0.888  | 0.515      | 0.731  |
| Fish and seafood    | 0.304      | 0.331  | 0.292      | 0.330  |
| Carbohydrate        | 0.811      | 0.788  | 0.814      | 0.776  |
| Fiber               | 0.782      | 0.663  | 0.791      | 0.701  |
| Milk                | 0.605      | 0.303  | 0.412      | 0.207  |
| Yogurt              | 0.349      | 0.174  | 0.163      | 0.034  |

All Pearson's correlation coefficients were significantly different from zero (P<0.05).

**Table S4** Sensitivity analysis of yogurt intake based on categories of dietary potassium intake in the PLCO trial

|                                       | Continuous        | Quintile 1 | Quintile 2        | Quintile 3                             | Quintile 4        | Quintile 5        |
|---------------------------------------|-------------------|------------|-------------------|----------------------------------------|-------------------|-------------------|
| Male (N=44,959)                       |                   |            |                   |                                        |                   |                   |
| Dietary potassium intake <sup>a</sup> | 3489.9            | <2935.9    | 2935.9-3319.7     | 3319.7-3670.0                          | 3670.0-4142.0     | ≥4142.0           |
| Cases/person-years                    | 735/343836        | 152/68795  | 127/68496         | 145/68642                              | 159/68905         | 152/68998         |
| Multivariable model HR <sup>b</sup>   | 1.06 (0.97, 1.17) | 1.00       | 0.93 (0.73, 1.18) | 1.05 (0.83, 1.33)                      | 1.12 (0.89, 1.41) | 1.05 (0.83, 1.33) |
| P value                               | 0.191             |            |                   | P <sub>trend</sub> <sup>c</sup> =0.354 |                   |                   |
| Female (N=48,025)                     |                   |            |                   |                                        |                   |                   |
| Dietary potassium intake <sup>a</sup> | 2943.8            | <2463.4    | 2463.4-2797.0     | 2797.0-3096.8                          | 3096.8-3487.7     | ≥3487.7           |
| Cases/person-years                    | 543/390992        | 123/77876  | 106/77994         | 87/77975                               | 103/78589         | 124/78558         |
| Multivariable model HR <sup>b</sup>   | 0.97 (0.86, 1.10) | 1.00       | 0.90 (0.69, 1.18) | 0.73 (0.55, 0.96)                      | 0.84 (0.64, 1.10) | 0.94 (0.72, 1.22) |
| P value                               | 0.629             |            |                   | P <sub>trend</sub> <sup>c</sup> =0.633 |                   |                   |
| ALL (N=92,984)                        |                   |            |                   |                                        |                   |                   |
| Dietary potassium intake <sup>a</sup> | 3203.4            | <2689.6    | 2689.6-3044.9     | 3044.9-3371.5                          | 3371.5-3808.0     | ≥3808.0           |
| Cases/person-years                    | 1278/734829       | 273/145886 | 243/146337        | 243/146963                             | 247/147928        | 272/147715        |
| Multivariable model HR <sup>b</sup>   | 1.03 (0.96, 1.11) | 1.00       | 1.01 (0.85, 1.21) | 1.01 (0.85, 1.21)                      | 1.01 (0.84, 1.20) | 1.05 (0.88, 1.25) |
| P value                               | 0.437             |            |                   | P <sub>trend</sub> <sup>c</sup> =0.607 |                   |                   |

<sup>a</sup>Potassium intake was energy-adjusted (mg/day), median intake for continuous and range for quintiles. <sup>b</sup>Cox proportional hazard models were used to adjust age, gender (only in ALL), body mass index (kg/m<sup>2</sup>), energy intake (kcal/day), educational level (3 categories), alcohol consumption (g/day), yogurt consumption (g/day), smoking status (never smokers, former smokers <20 pack-years, former smokers ≥20 pack-years, current smokers <20 pack-years, current smokers ≥20 pack-years), history of diabetes (yes or no), and family history of lung cancer (yes or no). <sup>c</sup>Test for linear trend was estimated by assigning the median value of potassium intake in each quintile.

**Table S5** Sensitivity analysis of race based on categories of dietary mineral intake

|                                     | Continuous        | Quintile 1 | Quintile 2        | Quintile 3                             | Quintile 4        | Quintile 5        |
|-------------------------------------|-------------------|------------|-------------------|----------------------------------------|-------------------|-------------------|
| <b>Potassium</b>                    |                   |            |                   |                                        |                   |                   |
| WHI (female only)                   |                   |            |                   |                                        |                   |                   |
| Dietary intake <sup>a</sup>         | 2619.5            | <2153.6    | 2153.6-2473.8     | 2473.8-2768.2                          | 2768.2-3139.5     | ≥3139.5           |
| Cases/person-years                  | 1631/1123470      | 368/207916 | 336/220409        | 332/228708                             | 304/231972        | 291/234465        |
| Multivariable model HR <sup>b</sup> | 0.94 (0.86, 1.02) | 1.00       | 0.93 (0.80, 1.09) | 0.92 (0.78, 1.07)                      | 0.84 (0.72, 0.99) | 0.82 (0.69, 0.96) |
| P value                             | 0.112             |            |                   | P <sub>trend</sub> <sup>c</sup> =0.007 |                   |                   |
| Female in the PLCO                  |                   |            |                   |                                        |                   |                   |
| Dietary intake <sup>a</sup>         | 2943.8            | <2463.4    | 2463.4-2797.0     | 2797.0-3096.8                          | 3096.8-3487.7     | ≥3487.7           |
| Cases/person-years                  | 543/390992        | 123/77876  | 106/77994         | 87/77975                               | 103/78589         | 124/78558         |
| Multivariable model HR <sup>b</sup> | 0.98 (0.87, 1.11) | 1.00       | 0.92 (0.70, 1.20) | 0.73 (0.55, 0.98)                      | 0.85 (0.65, 1.12) | 0.95 (0.74, 1.23) |
| P value                             | 0.725             |            |                   | P <sub>trend</sub> <sup>c</sup> =0.715 |                   |                   |
| Male in the PLCO                    |                   |            |                   |                                        |                   |                   |
| Dietary intake <sup>a</sup>         | 3489.9            | <2935.9    | 2935.9-3319.7     | 3319.7-3670.0                          | 3670.0-4142.0     | ≥4142.0           |
| Cases/person-years                  | 735/343836        | 152/68795  | 127/68496         | 145/68642                              | 159/68905         | 152/68998         |
| Multivariable model HR <sup>b</sup> | 1.05 (0.95, 1.15) | 1.00       | 0.90 (0.71, 1.15) | 1.01 (0.80, 1.29)                      | 1.07 (0.85, 1.35) | 1.01 (0.80, 1.28) |
| P value                             | 0.346             |            |                   | P <sub>trend</sub> <sup>c</sup> =0.569 |                   |                   |
| <b>Sodium</b>                       |                   |            |                   |                                        |                   |                   |
| WHI (female only)                   |                   |            |                   |                                        |                   |                   |
| Dietary intake <sup>a</sup>         | 2620.2            | <2291.5    | 2291.5-2522.5     | 2522.5-2722.4                          | 2722.4-2980.3     | ≥2980.3           |
| Cases/person-years                  | 1631/1123470      | 337/221914 | 293/224463        | 343/224825                             | 313/226959        | 345/225309        |
| Multivariable model HR <sup>b</sup> | 1.09 (0.99, 1.21) | 1.00       | 0.94 (0.80, 1.11) | 1.14 (0.98, 1.34)                      | 1.04 (0.89, 1.22) | 1.11 (0.95, 1.30) |
| P value                             | 0.084             |            |                   | P <sub>trend</sub> <sup>c</sup> =0.093 |                   |                   |
| Female in the PLCO                  |                   |            |                   |                                        |                   |                   |
| Dietary intake <sup>a</sup>         | 2361.2            | <2083.6    | 2083.6-2280.3     | 2280.3-2442.9                          | 2442.9-2656.4     | ≥2656.4           |
| Cases/person-years                  | 543/390992        | 143/77508  | 101/78109         | 106/78154                              | 100/78802         | 93/78418          |
| Multivariable model HR <sup>b</sup> | 0.86 (0.71, 1.04) | 1.00       | 0.82 (0.63, 1.07) | 0.93 (0.72, 1.21)                      | 0.84 (0.65, 1.10) | 0.74 (0.56, 0.97) |
| P value                             | 0.114             |            |                   | P <sub>trend</sub> <sup>c</sup> =0.043 |                   |                   |
| Male in the PLCO                    |                   |            |                   |                                        |                   |                   |
| Dietary intake <sup>a</sup>         | 3108.9            | <2732.1    | 2732.1-2996.7     | 2996.7-3229.6                          | 3229.6-3551.6     | ≥3551.6           |
| Cases/person-years                  | 735/343836        | 155/68264  | 127/68502         | 149/68646                              | 159/69025         | 145/69399         |
| Multivariable model HR <sup>b</sup> | 1.18 (1.04, 1.34) | 1.00       | 1.00 (0.78, 1.28) | 1.23 (0.97, 1.56)                      | 1.31 (1.04, 1.66) | 1.18 (0.92, 1.51) |
| P value                             | 0.011             |            |                   | P <sub>trend</sub> <sup>c</sup> =0.055 |                   |                   |

<sup>a</sup>Mineral intake was energy-adjusted (mg/day), median intake for continuous and range for quintiles. <sup>b</sup>Cox proportional hazard models were used to adjust age, body mass index (kg/m<sup>2</sup>), race (white, black, Hispanic, Asian or pacific islander, others), energy intake (kcal/day), educational level (3 categories), alcohol consumption (g/day), smoking status (never smokers, former smokers <20 pack-years, former smokers ≥20 pack-years, current smokers <20 pack-years, current smokers ≥20 pack-years), history of diabetes (yes or no), and family history of lung cancer (yes or no) for the PLCO trial or family history of cancer (yes or no) for the WHI cohort. <sup>c</sup>Test for linear trend was estimated by assigning the median value of sodium or potassium intake in each quintile.

**Table S6** Smoking-status-specific hazard ratios and 95% confidence intervals of lung cancer based on categories of dietary sodium intake

|                                     | Continuous        | Quintile 1 | Quintile 2        | Quintile 3        | Quintile 4        | Quintile 5        |
|-------------------------------------|-------------------|------------|-------------------|-------------------|-------------------|-------------------|
| PLCO (male, N=44,959)               |                   |            |                   |                   |                   |                   |
| Non-smoker                          |                   |            |                   |                   |                   |                   |
| Dietary sodium intake <sup>a</sup>  | 3083.1            | <2728.9    | 2728.9-2982.2     | 2982.2-3193.7     | 3193.7-3486.5     | ≥3486.5           |
| Cases/person-years                  | 38/132602         | 7/26494    | 8/26247           | 10/26296          | 10/26764          | 3/26801           |
| Multivariable model HR <sup>b</sup> | 1.00 (0.52, 1.94) | 1.00       | 1.05 (0.37, 2.99) | 1.35 (0.49, 3.69) | 1.36 (0.50, 3.70) | 0.45 (0.11, 1.81) |
| Smoker                              |                   |            |                   |                   |                   |                   |
| Dietary sodium intake <sup>a</sup>  | 3124.7            | <2733.5    | 2733.5-3006.1     | 3006.1-3251.2     | 3251.2-3588.8     | ≥3588.8           |
| Cases/person-years                  | 697/211235        | 144/41856  | 125/42163         | 135/42288         | 153/42286         | 140/42642         |
| Multivariable model HR <sup>b</sup> | 1.15 (1.01, 1.31) | 1.00       | 0.95 (0.74, 1.22) | 1.06 (0.83, 1.36) | 1.23 (0.97, 1.57) | 1.13 (0.88, 1.46) |
| PLCO (female, N=48,025)             |                   |            |                   |                   |                   |                   |
| Non-smoker                          |                   |            |                   |                   |                   |                   |
| Dietary sodium intake <sup>a</sup>  | 2346.0            | <2075.4    | 2075.4-2267.9     | 2267.9-2423.1     | 2423.1-2627.2     | ≥2627.2           |
| Cases/person-years                  | 67/226058         | 16/45162   | 12/45091          | 11/45054          | 14/45381          | 14/45370          |
| Multivariable model HR <sup>b</sup> | 1.34 (0.77, 2.35) | 1.00       | 0.77 (0.36, 1.65) | 0.74 (0.34, 1.62) | 0.98 (0.47, 2.05) | 1.04 (0.50, 2.16) |
| Smoker                              |                   |            |                   |                   |                   |                   |
| Dietary sodium intake <sup>a</sup>  | 2381.4            | <2093.0    | 2093.0-2297.8     | 2297.8-2469.7     | 2469.7-2698.1     | ≥2698.1           |
| Cases/person-years                  | 476/164935        | 128/32360  | 88/33054          | 97/33042          | 90/33430          | 73/33049          |
| Multivariable model HR <sup>b</sup> | 0.75 (0.61, 0.93) | 1.00       | 0.7 (0.53, 0.93)  | 0.8 (0.61, 1.05)  | 0.77 (0.58, 1.02) | 0.63 (0.47, 0.85) |
| WHI (N=72,425)                      |                   |            |                   |                   |                   |                   |
| Non-smoker                          |                   |            |                   |                   |                   |                   |
| Dietary sodium intake <sup>a</sup>  | 2606.6            | <2288.0    | 2288.0-2512.8     | 2512.8-2706.5     | 2706.5-2955.8     | ≥2955.8           |
| Cases/person-years                  | 299/591252        | 47/117619  | 59/118170         | 75/117939         | 50/119520         | 68/118004         |
| Multivariable model HR <sup>b</sup> | 1.06 (0.83, 1.36) | 1.00       | 1.18 (0.80, 1.74) | 1.48 (1.02, 2.15) | 0.96 (0.64, 1.44) | 1.31 (0.90, 1.90) |
| Smoker                              |                   |            |                   |                   |                   |                   |
| Dietary sodium intake <sup>a</sup>  | 2635.4            | <2294.5    | 2294.5-2532.3     | 2532.3-2739.6     | 2739.6-3008.8     | ≥3008.8           |
| Cases/person-years                  | 1332/532218       | 274/104588 | 247/106122        | 275/106719        | 262/107372        | 274/107417        |
| Multivariable model HR <sup>b</sup> | 1.02 (0.91, 1.15) | 1.00       | 0.89 (0.74, 1.06) | 1.01 (0.85, 1.19) | 0.97 (0.81, 1.15) | 1.02 (0.86, 1.21) |

<sup>a</sup>Mineral intake was energy-adjusted (mg/day), median intake for continuous and range for quintiles. <sup>b</sup>Cox proportional hazard models were used to adjust age, body mass index (kg/m<sup>2</sup>), energy intake (kcal/day), educational level (3 categories), alcohol consumption (g/day), history of diabetes (yes or no), and family history of cancer (yes or no).

**Table S7** Smoking-status-specific hazard ratios and 95% confidence intervals of lung cancer based on categories of dietary potassium intake

|                                       | Continuous        | Quintile 1 | Quintile 2        | Quintile 3        | Quintile 4        | Quintile 5        |
|---------------------------------------|-------------------|------------|-------------------|-------------------|-------------------|-------------------|
| PLCO (male, N=44,959)                 |                   |            |                   |                   |                   |                   |
| Non-smoker                            |                   |            |                   |                   |                   |                   |
| Dietary potassium intake <sup>a</sup> | 3437.7            | <2897.7    | 2897.7-3270.6     | 3270.6-3601.0     | 3601.0-4064.8     | ≥4064.8           |
| Cases/person-years                    | 38/132602         | 6/26769    | 9/26261           | 8/26410           | 7/26640           | 8/26522           |
| Multivariable model HR <sup>b</sup>   | 1.05 (0.67, 1.64) | 1.00       | 1.35 (0.47, 3.85) | 1.18 (0.40, 3.47) | 1.06 (0.35, 3.20) | 1.35 (0.46, 3.96) |
| Smoker                                |                   |            |                   |                   |                   |                   |
| Dietary potassium intake <sup>a</sup> | 3524.1            | <2959.1    | 2959.1-3350.0     | 3350.0-3707.1     | 3707.1-4190.8     | ≥4190.8           |
| Cases/person-years                    | 697/211235        | 146/42028  | 121/42262         | 141/42213         | 151/42261         | 138/42471         |
| Multivariable model HR <sup>b</sup>   | 1.05 (0.96, 1.16) | 1.00       | 0.87 (0.68, 1.12) | 1.01 (0.79, 1.28) | 1.09 (0.86, 1.38) | 1.01 (0.79, 1.29) |
| PLCO (female, N=48,025)               |                   |            |                   |                   |                   |                   |
| Non-smoker                            |                   |            |                   |                   |                   |                   |
| Dietary potassium intake <sup>a</sup> | 2911.6            | <2439.0    | 2439.0-2767.7     | 2767.7-3061.8     | 3061.8-3442.9     | ≥3442.9           |
| Cases/person-years                    | 67/226058         | 13/45159   | 12/45148          | 8/45041           | 16/45279          | 18/45431          |
| Multivariable model HR <sup>b</sup>   | 1.08 (0.75, 1.55) | 1.00       | 0.84 (0.38, 1.87) | 0.54 (0.22, 1.32) | 1.06 (0.50, 2.23) | 1.18 (0.57, 2.43) |
| Smoker                                |                   |            |                   |                   |                   |                   |
| Dietary potassium intake <sup>a</sup> | 2987.3            | <2497.0    | 2497.0-2838.6     | 2838.6-3145.3     | 3145.3-3547.2     | ≥3547.2           |
| Cases/person-years                    | 476/164935        | 113/32702  | 98/32878          | 80/32926          | 86/33252          | 99/33177          |
| Multivariable model HR <sup>b</sup>   | 0.89 (0.78, 1.02) | 1.00       | 0.85 (0.64, 1.11) | 0.68 (0.51, 0.92) | 0.72 (0.54, 0.96) | 0.82 (0.63, 1.08) |
| WHI (N=72,425)                        |                   |            |                   |                   |                   |                   |
| Non-smoker                            |                   |            |                   |                   |                   |                   |
| Dietary potassium intake <sup>a</sup> | 2620.1            | <2155.4    | 2155.4-2475.3     | 2475.3-2768.3     | 2768.3-3141.0     | ≥3141.0           |
| Cases/person-years                    | 299/591252        | 49/109249  | 61/116531         | 58/120013         | 56/122309         | 75/123150         |
| Multivariable model HR <sup>b</sup>   | 1.02 (0.85, 1.23) | 1.00       | 1.04 (0.71, 1.52) | 0.91 (0.61, 1.34) | 0.82 (0.55, 1.21) | 1.05 (0.72, 1.51) |
| Smoker                                |                   |            |                   |                   |                   |                   |
| Dietary potassium intake <sup>a</sup> | 2618.2            | <2153.2    | 2153.2-2473.5     | 2473.5-2768.1     | 2768.1-3138.1     | ≥3138.1           |
| Cases/person-years                    | 1332/532218       | 317/98557  | 270/103957        | 278/108909        | 243/109755        | 224/111040        |
| Multivariable model HR <sup>b</sup>   | 0.77 (0.7, 0.85)  | 1.00       | 0.77 (0.65, 0.90) | 0.74 (0.63, 0.87) | 0.63 (0.53, 0.75) | 0.57 (0.48, 0.68) |

<sup>a</sup>Mineral intake was energy-adjusted (mg/day), median intake for continuous and range for quintiles. <sup>b</sup>Cox proportional hazard models were used to adjust age, body mass index (kg/m<sup>2</sup>), energy intake (kcal/day), educational level (3 categories), alcohol consumption (g/day), history of diabetes (yes or no), and family history of cancer (yes or no).

**Table S8** Hazard ratios and 95% confidence intervals of NSCLC based on categories of dietary mineral intake

|                                     | Continuous        | Quintile 1 | Quintile 2        | Quintile 3        | Quintile 4        | Quintile 5        |
|-------------------------------------|-------------------|------------|-------------------|-------------------|-------------------|-------------------|
| <b>Potassium</b>                    |                   |            |                   |                   |                   |                   |
| WHI (female only)                   |                   |            |                   |                   |                   |                   |
| Dietary intake <sup>a</sup>         | 2620.0            | <2154.1    | 2154.1-2474.5     | 2474.5-2768.9     | 2768.9-3139.7     | >3139.7           |
| Cases/person-years                  | 1258/1119323      | 272/207260 | 248/219708        | 258/227841        | 252/231049        | 228/233465        |
| Multivariable model HR <sup>b</sup> | 0.95 (0.87, 1.04) | 1.00       | 0.90 (0.76, 1.08) | 0.92 (0.78, 1.10) | 0.90 (0.75, 1.07) | 0.82 (0.68, 0.98) |
| P value                             | 0.296             | 0.044      |                   |                   |                   |                   |
| Female in the PLCO                  |                   |            |                   |                   |                   |                   |
| Dietary intake <sup>a</sup>         | 2943.6            | <2463.5    | 2463.5-2796.9     | 2796.9-3096.6     | 3096.6-3487.5     | >3487.5           |
| Cases/person-years                  | 466/390602        | 103/77807  | 91/77910          | 76/77886          | 90/78513          | 106/78485         |
| Multivariable model HR <sup>b</sup> | 0.96 (0.84, 1.09) | 1.00       | 0.90 (0.67, 1.20) | 0.73 (0.54, 0.98) | 0.84 (0.63, 1.12) | 0.92 (0.70, 1.21) |
| P value                             | 0.504             | 0.572      |                   |                   |                   |                   |
| Male in the PLCO                    |                   |            |                   |                   |                   |                   |
| Dietary intake <sup>a</sup>         | 3489.3            | <2935.4    | 2935.4-3318.9     | 3318.9-3669.3     | 3669.3-4141.1     | >4141.1           |
| Cases/person-years                  | 626/343406        | 129/68713  | 109/68395         | 121/68569         | 138/68812         | 129/68917         |
| Multivariable model HR <sup>b</sup> | 1.06 (0.96, 1.17) | 1.00       | 0.92 (0.71, 1.19) | 1.02 (0.79, 1.31) | 1.12 (0.88, 1.44) | 1.05 (0.81, 1.35) |
| P value                             | 0.248             | 0.380      |                   |                   |                   |                   |
| Female in two cohorts               |                   |            |                   |                   |                   |                   |
| Dietary intake <sup>a</sup>         | 2750.1            | <2254.2    | 2254.2-2598.0     | 2598.0-2907.1     | 2907.1-3298.1     | >3298.1           |
| Cases/person-years                  | 1724/1509925      | 401/313186 | 360/316330        | 370/306196        | 276/296119        | 317/278094        |
| Multivariable model HR <sup>b</sup> | 0.95 (0.88, 1.03) | 1.00       | 0.94 (0.82, 1.09) | 1.00 (0.87, 1.16) | 0.77 (0.66, 0.91) | 0.91 (0.78, 1.06) |
| P value                             | 0.201             | 0.079      |                   |                   |                   |                   |
| <b>Sodium</b>                       |                   |            |                   |                   |                   |                   |
| WHI (female only)                   |                   |            |                   |                   |                   |                   |
| Dietary intake <sup>a</sup>         | 2620.1            | <2291.5    | 2291.5-2522.3     | 2522.3-2722.2     | 2722.2-2980.2     | >2980.2           |
| Cases/person-years                  | 1258/1119323      | 254/221225 | 237/223500        | 264/224031        | 237/226100        | 266/224467        |
| Multivariable model HR <sup>b</sup> | 1.10 (0.98, 1.23) | 1.00       | 1.00 (0.84, 1.20) | 1.16 (0.97, 1.39) | 1.04 (0.87, 1.25) | 1.13 (0.95, 1.35) |
| P value                             | 0.114             | 0.168      |                   |                   |                   |                   |
| Female in the PLCO                  |                   |            |                   |                   |                   |                   |
| Dietary intake <sup>a</sup>         | 2361              | <2083.7    | 2083.7-2280.1     | 2280.1-2442.7     | 2442.7-2656.3     | >2656.3           |
| Cases/person-years                  | 466/390602        | 116/77472  | 95/78008          | 95/78058          | 83/78741          | 77/78322          |
| Multivariable model HR <sup>b</sup> | 0.82 (0.66, 1.01) | 1.00       | 0.91 (0.69, 1.21) | 0.98 (0.74, 1.31) | 0.83 (0.62, 1.11) | 0.73 (0.54, 0.98) |
| P value                             | 0.058             | 0.03       |                   |                   |                   |                   |
| Male in the PLCO                    |                   |            |                   |                   |                   |                   |
| Dietary intake <sup>a</sup>         | 3108.5            | <2731.7    | 2731.7-2996.2     | 2996.2-3228.9     | 3228.9-3551.0     | >3551.0           |
| Cases/person-years                  | 626/343406        | 128/68174  | 110/68399         | 133/68534         | 132/68979         | 123/69321         |
| Multivariable model HR <sup>b</sup> | 1.22 (1.06, 1.40) | 1.00       | 1.02 (0.78, 1.33) | 1.31 (1.01, 1.69) | 1.32 (1.02, 1.71) | 1.23 (0.94, 1.61) |
| P value                             | 0.004             |            |                   | 0.044             |                   |                   |
| Female in two cohorts               |                   |            |                   |                   |                   |                   |
| Dietary intake <sup>a</sup>         | 2507.6            | <2186.2    | 2186.2-2409.2     | 2409.2-2610.3     | 2610.3-2871.3     | >2871.3           |
| Cases/person-years                  | 1724/1509925      | 328/265041 | 294/278409        | 355/300244        | 366/324259        | 381/341972        |
| Multivariable model HR <sup>b</sup> | 1.02 (0.93, 1.13) | 1.00       | 0.95 (0.81, 1.11) | 1.10 (0.94, 1.28) | 1.06 (0.90, 1.24) | 1.04 (0.89, 1.21) |
| P value                             | 0.651             |            |                   | 0.590             |                   |                   |

NSCLC, non-small cell lung cancer. <sup>a</sup>Mineral intake was energy-adjusted (mg/day), median intake for continuous and range for quintiles. <sup>b</sup>Cox proportional hazard models were used to adjust age, body mass index (kg/m<sup>2</sup>), energy intake (kcal/day), educational level (3 categories), alcohol consumption (g/day), smoking status (never smokers, former smokers <20 pack-years, former smokers ≥20 pack-years, current smokers <20 pack-years, current smokers ≥20 pack-years), history of diabetes (yes or no), and family history of lung cancer (yes or no) for the PLCO trial or family history of cancer (yes or no) for the WHI cohort. <sup>c</sup>Test for linear trend was estimated by assigning the median value of sodium or potassium intake in each quintile.



**Table S9** Hazard ratios and 95% confidence intervals of SCLC based on categories of dietary mineral intake

|                                     | Continuous        | Quintile 1 | Quintile 2        | Quintile 3        | Quintile 4        | Quintile 5        |
|-------------------------------------|-------------------|------------|-------------------|-------------------|-------------------|-------------------|
| <b>Potassium</b>                    |                   |            |                   |                   |                   |                   |
| WHI (female only)                   |                   |            |                   |                   |                   |                   |
| Dietary intake <sup>a</sup>         | 2620.1            | <2154.6    | 2154.6-2474.5     | 2474.5-2769.1     | 2769.1-3140.5     | >3140.5           |
| Cases/person-years                  | 104/1107063       | 25/204969  | 28/217172         | 22/225340         | 13/228607         | 16/230975         |
| Multivariable model HR <sup>b</sup> | 1.01 (0.74, 1.38) | 1.00       | 1.48 (0.85, 2.57) | 1.29 (0.72, 2.34) | 0.85 (0.43, 1.69) | 1.14 (0.60, 2.19) |
| P value                             | 0.934             | 0.874      |                   |                   |                   |                   |
| Female in the PLCO                  |                   |            |                   |                   |                   |                   |
| Dietary intake <sup>a</sup>         | 2944.1            | <2464.1    | 2464.1-2797.8     | 2797.8-3096.9     | 3096.9-3486.9     | >3486.9           |
| Cases/person-years                  | 77/388847         | 20/77436   | 15/77545          | 11/77490          | 13/78192          | 18/78183          |
| Multivariable model HR <sup>b</sup> | 1.01 (0.74, 1.37) | 1.00       | 0.89 (0.45, 1.76) | 0.67 (0.32, 1.44) | 0.76 (0.37, 1.56) | 0.96 (0.50, 1.84) |
| P value                             | 0.967             |            |                   | 0.839             |                   |                   |
| Male in the PLCO                    |                   |            |                   |                   |                   |                   |
| Dietary intake <sup>a</sup>         | 3489.2            | <2936.0    | 2936.0-3319.1     | 3319.1-3669.2     | 3669.2-4141.2     | >4141.2           |
| Cases/person-years                  | 109/340959        | 23/68263   | 19/67890          | 23/68001          | 21/68349          | 23/68456          |
| Multivariable model HR <sup>b</sup> | 1.09 (0.87, 1.37) | 1.00       | 1.04 (0.55, 1.96) | 1.26 (0.68, 2.32) | 1.09 (0.58, 2.04) | 1.11 (0.60, 2.06) |
| P value                             | 0.474             |            |                   | 0.740             |                   |                   |
| Female in two cohorts               |                   |            |                   |                   |                   |                   |
| Dietary intake <sup>a</sup>         | 2751.2            | <2255.2    | 2255.2-2598.8     | 2598.8-2908.6     | 2908.6-3299.1     | >3299.1           |
| Cases/person-years                  | 181/1495909       | 49/310423  | 37/313390         | 32/303463         | 26/293127         | 37/275507         |
| Multivariable model HR <sup>b</sup> | 1.02 (0.82, 1.27) | 1.00       | 1.01 (0.65, 1.56) | 0.91 (0.57, 1.44) | 0.76 (0.46, 1.25) | 1.02 (0.64, 1.61) |
| P value                             | 0.845             |            |                   | 0.916             |                   |                   |
| <b>Sodium</b>                       |                   |            |                   |                   |                   |                   |
| WHI (female only)                   |                   |            |                   |                   |                   |                   |
| Dietary intake <sup>a</sup>         | 2620.2            | <2291.7    | 2291.7-2522.3     | 2522.3-2722.4     | 2722.4-2980.1     | >2980.1           |
| Cases/person-years                  | 104/1107063       | 24/218814  | 11/220929         | 23/221658         | 21/223590         | 25/222071         |
| Multivariable model HR <sup>b</sup> | 1.23 (0.84, 1.80) | 1.00       | 0.57 (0.27, 1.17) | 1.31 (0.72, 2.38) | 1.22 (0.66, 2.24) | 1.37 (0.76, 2.46) |
| P value                             | 0.289             |            |                   | 0.101             |                   |                   |
| Female in the PLCO                  |                   |            |                   |                   |                   |                   |
| Dietary intake <sup>a</sup>         | 2361.8            | <2084.4    | 2084.4-2280.8     | 2280.8-2443.7     | 2443.7-2656.9     | >2656.9           |
| Cases/person-years                  | 77/388847         | 27/77185   | 6/77711           | 11/77733          | 17/78303          | 16/77915          |
| Multivariable model HR <sup>b</sup> | 0.90 (0.56, 1.43) | 1.00       | 0.27 (0.11, 0.67) | 0.57 (0.27, 1.18) | 0.80 (0.43, 1.52) | 0.63 (0.33, 1.20) |
| P value                             | 0.642             |            |                   | 0.437             |                   |                   |
| Male in the PLCO                    |                   |            |                   |                   |                   |                   |
| Dietary intake <sup>a</sup>         | 3108.5            | <2731.9    | 2731.9-2996.2     | 2996.2-3229.2     | 3229.2-3551.6     | >3551.6           |
| Cases/person-years                  | 109/340959        | 28/67692   | 16/67906          | 16/68081          | 27/68453          | 22/68828          |
| Multivariable model HR <sup>b</sup> | 1.03 (0.75, 1.41) | 1.00       | 0.80 (0.42, 1.52) | 0.83 (0.43, 1.59) | 1.31 (0.74, 2.33) | 0.95 (0.51, 1.75) |
| P value                             | 0.872             |            |                   | 0.729             |                   |                   |
| Female in two cohorts               |                   |            |                   |                   |                   |                   |
| Dietary intake <sup>a</sup>         | 2507.3            | <2186.2    | 2186.2-2408.9     | 2408.9-2609.9     | 2609.9-2871.0     | >2871.0           |
| Cases/person-years                  | 181/1495909       | 47/262551  | 24/275882         | 34/297246         | 36/321279         | 40/338951         |
| Multivariable model HR <sup>b</sup> | 1.07 (0.80, 1.44) | 1.00       | 0.64 (0.38, 1.05) | 0.95 (0.60, 1.51) | 1.00 (0.63, 1.58) | 1.11 (0.70, 1.74) |
| P value                             | 0.652             |            |                   | 0.164             |                   |                   |

SCLC, small cell lung cancer. <sup>a</sup>Mineral intake was energy-adjusted (mg/day), median intake for continuous and range for quintiles. <sup>b</sup>Cox proportional hazard models were used to adjust age, body mass index (kg/m<sup>2</sup>), energy intake (kcal/day), educational level (3 categories), alcohol consumption (g/day), smoking status (never smokers, former smokers <20 pack-years, former smokers ≥20 pack-years, current smokers <20 pack-years, current smokers ≥20 pack-years), history of diabetes (yes or no), and family history of lung cancer (yes or no) for the PLCO trial or family history of cancer (yes or no) for the WHI cohort. <sup>c</sup>Test for linear trend was estimated by assigning the median value of sodium or potassium intake in each quintile.
